# Supplementary material
Source: MDPI journal article supplement (https://www.mdpi.com/2073-4352/13/3/534)
Supplement: s1 [file s1]

## Supplementary materials

### Contents

|                                                                                                                 |   |
|-----------------------------------------------------------------------------------------------------------------|---|
| 1.EXD analysis of the samples .....                                                                             | 1 |
| 2.Reflectance coefficient vs $\text{Tm}^{3+}$ concentration at room temperature ( $T=293\text{ K}$ ).....       | 3 |
| 3.Kinetic decay curves of UCL recorded at 665 nm.....                                                           | 4 |
| 4.Refractive index spectrum in visible region for $\text{Bi}_2\text{O}_3/\text{Tm}_3\text{O}_3$ system.....     | 4 |
| 5.Complex dielectric functions in visible region for $\text{Bi}_2\text{O}_3/\text{Tm}_3\text{O}_3$ system ..... | 5 |
| 6.Polarization in visible region for $\text{Bi}_2\text{O}_3/\text{Tm}_3\text{O}_3$ system.....                  | 5 |

### 1.EXD analysis of the samples:

#### Sample 2

| O<br>(at.%) | Tm<br>(at.%) | Bi<br>(at.%) |
|-------------|--------------|--------------|
| 66          | 22           | 12           |

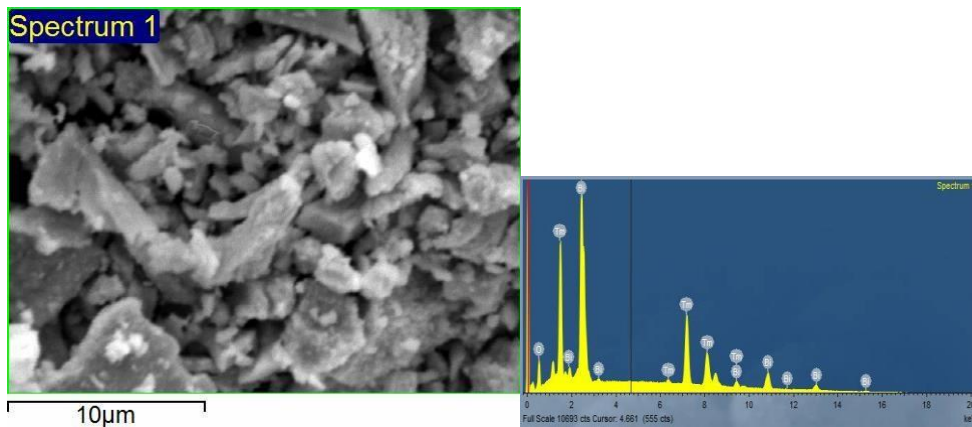

(a)

#### Sample 3

| O<br>(at.%) | Tm<br>(at.%) | Bi<br>(at.%) |
|-------------|--------------|--------------|
| 53          | 15           | 30           |

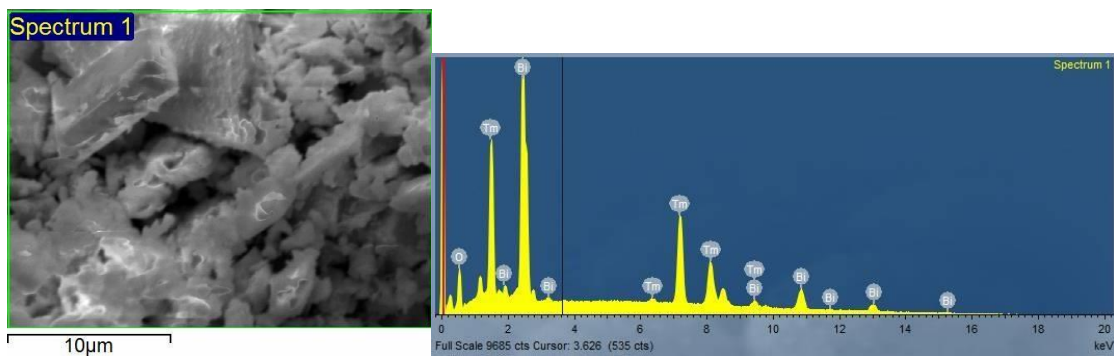

(b)

Sample 4

| O<br>(at.%) | Tm<br>(at.%) | Bi<br>(at.%) |
|-------------|--------------|--------------|
| 66          | 9            | 26           |

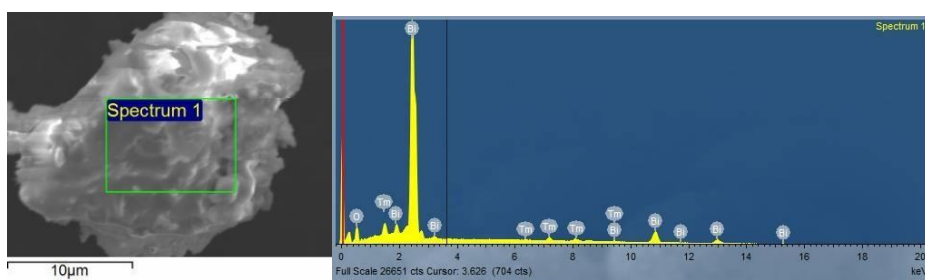

(c)

Sample 5

| O<br>(at.%) | Tm<br>(at.%) | Bi<br>(at.%) |
|-------------|--------------|--------------|
| 60          | 2            | 36           |

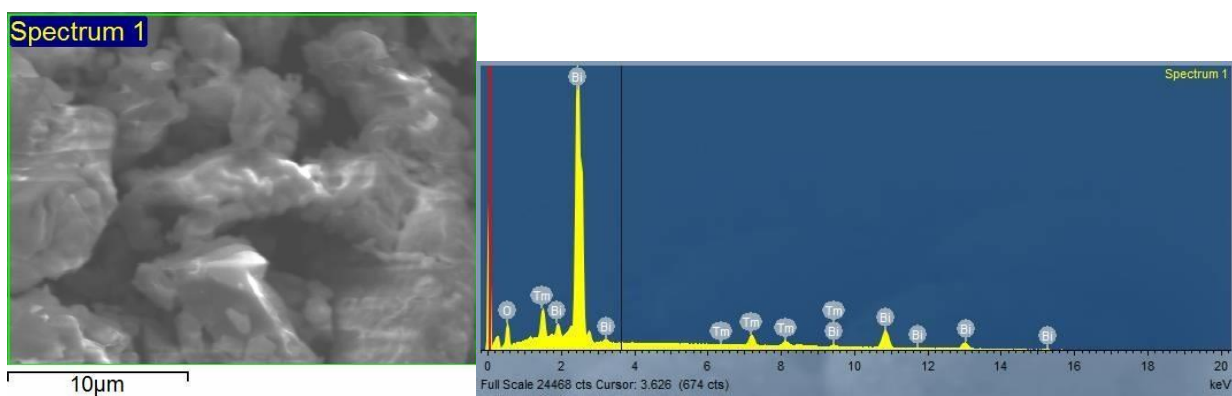

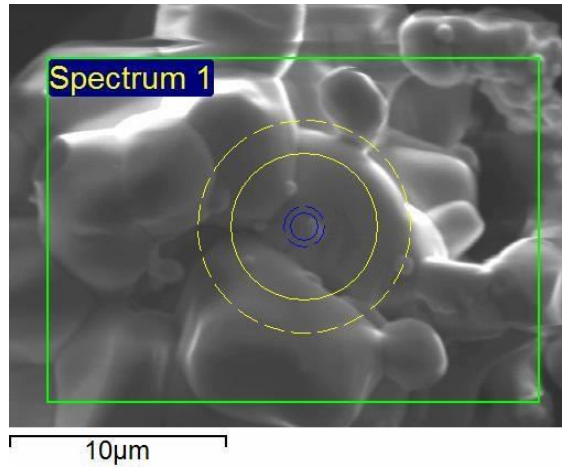

(d)

Fig.S1. The EXD analysis of the samples with the different atomic concentrations of the thulium and bismuth ions.

2.Reflectance coefficient vs  $\text{Tm}^{3+}$  concentration at room temperature ( $T=293\text{ K}$ )

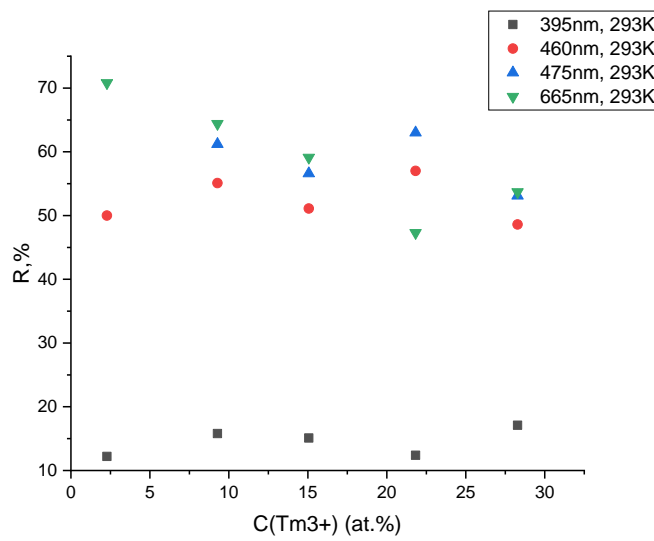

Fig.S2. The dynamic of  $R(\%)$  depending on the  $\text{Tm}^{3+}$  concentration at  $T=293\text{ K}$  at absorptionwavelength (395,460, 474, 665 nm).

### 3. Kinetic decay curves of UCL recorded at 665 nm

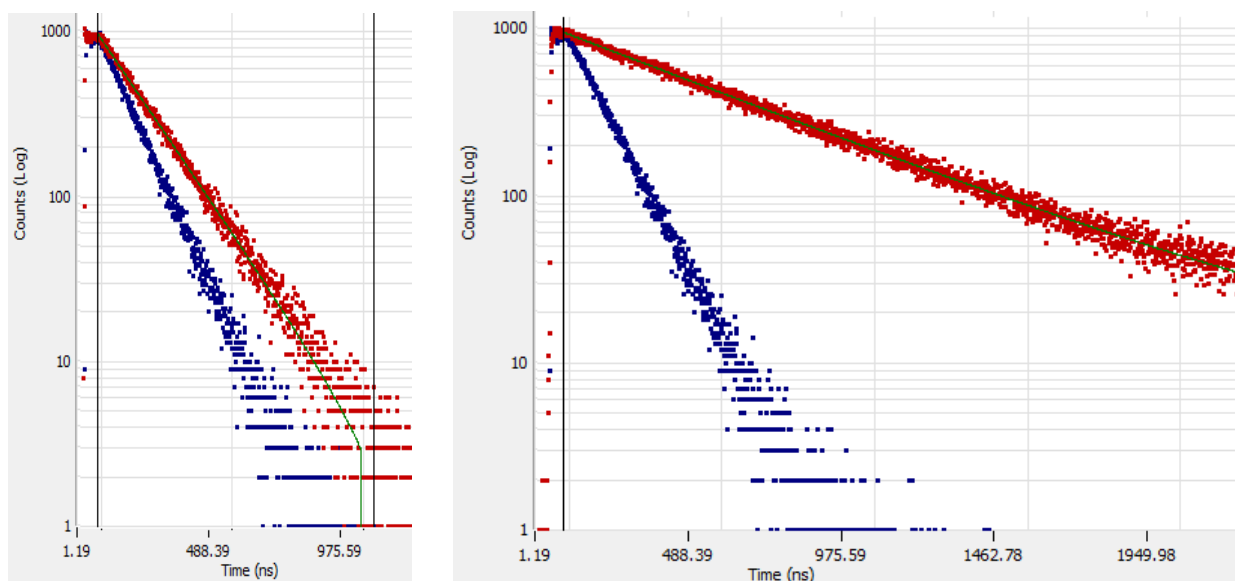

Fig.S3. Kinetic decay curves of UCL recorded at 665 nm under excitation with wavelengths of 980 nm (concentration of  $\text{Tm}^{3+}$  was of 15 at.% and 22 at.%) at  $T=80$  K.

### 4. Refractive index spectrum in visible region for $\text{Bi}_2\text{O}_3/\text{Tm}_3\text{O}_3$ system

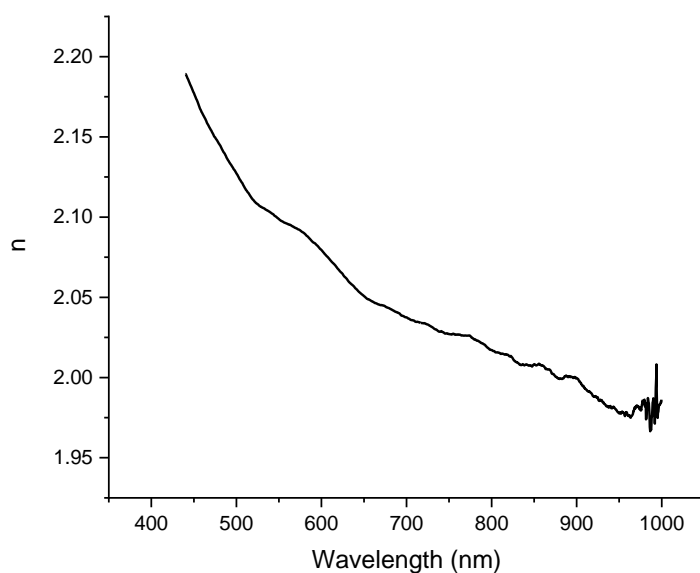

Fig.S4. Refractive index spectrum in visible region for  $\text{Bi}_2\text{O}_3/\text{Tm}_3\text{O}_3$  system.

### 5. Complex dielectric functions in visible region for $\text{Bi}_2\text{O}_3/\text{Tm}_3\text{O}_3$ system

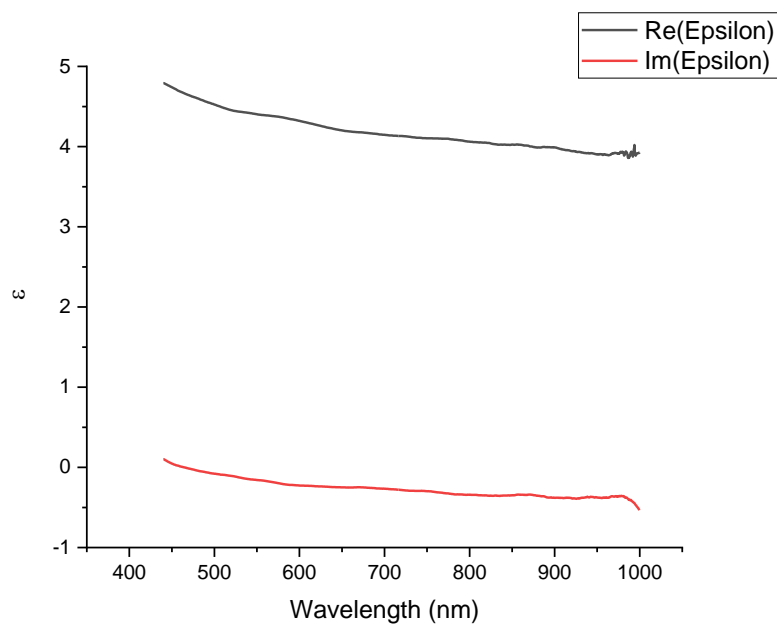

Fig.S5. Complex dielectric function in visible region for  $\text{Bi}_2\text{O}_3/\text{Tm}_3\text{O}_3$  system.

### 6. Polarization in visible region for $\text{Bi}_2\text{O}_3/\text{Tm}_3\text{O}_3$ system

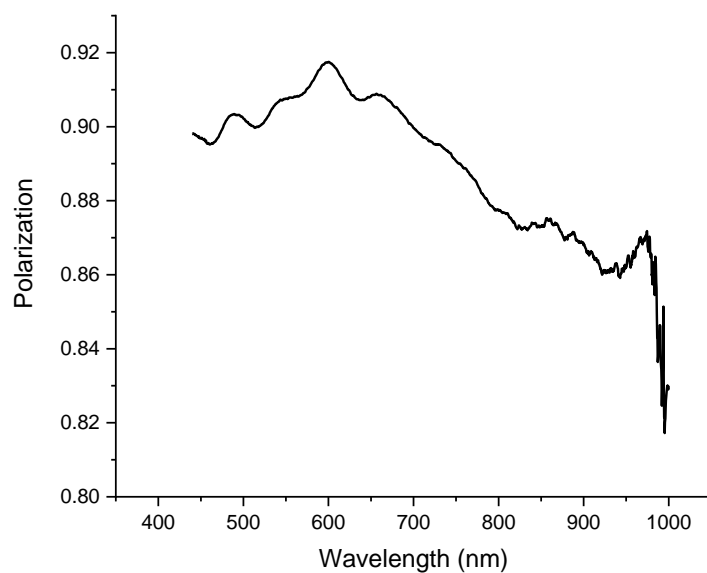

Fig.S6. Polarization in visible region for  $\text{Bi}_2\text{O}_3/\text{Tm}_3\text{O}_3$  system.
